# Supplementary material
Source: publisher site journal article supplement (https://www.scielo.br/pdf/rbti/v32n1/0103-507X-rbti-32-01-0017-suppl01.pdf)
Supplement: Supplementary file 1 [file 0103-507X-rbti-32-01-0017-suppl01.pdf]

# Epidemiologia e desfecho dos pacientes de alto risco cirúrgico admitidos em unidades de terapia intensiva no Brasil

## *Epidemiology and outcome of high-surgical-risk patients admitted to an intensive care unit in Brazil*

João Manoel Silva Júnior<sup>1,2,6</sup>, Renato Carneiro de Freitas Chaves<sup>1,3</sup>, Thiago Domingos Corrêa<sup>1</sup>, Murillo Santucci Cesar de Assunção<sup>1</sup>, Henrique Tadashi Katayama<sup>4</sup>, Fabio Eduardo Bosso<sup>5</sup>, Cristina Prata Amendola<sup>6</sup>, Ary Serpa Neto<sup>1</sup>, Luiz Marcelo Sá Malbouisson<sup>2</sup>, Neymar Elias de Oliveira<sup>7</sup>, Viviane Cordeiro Veiga<sup>8</sup>, Salomón Soriano Ordinola Rojas<sup>9</sup>, Natalia Fioravante Postalli<sup>8</sup>, Thais Kawagoe Alvarisa<sup>8</sup>, Bruno Mello Nobrega de Lucena<sup>2</sup>, Raphael Augusto Gomes de Oliveira<sup>2</sup>, Luciana Coelho Sanches<sup>9</sup>, Ulysses Vasconcellos de Andrade e Silva<sup>6</sup>, Antonio Paulo Nassar Junior<sup>9</sup>, Álvaro Réa-Neto<sup>10</sup>, Alexandre Amaral<sup>11</sup>, José Mário Teles<sup>11</sup>, Flávio Geraldo Rezende de Freitas<sup>12</sup>, Antônio Tonete Bafi<sup>12</sup>, Eduardo Souza Pacheco<sup>12</sup>, Fernando José Ramos<sup>13</sup>, José Mauro Vieira Júnior<sup>13</sup>, Maria Augusta Santos Rahe Pereira<sup>14</sup>, Fábio Sartori Scherz<sup>14</sup>, Giovanna Padoa de Menezes<sup>14</sup>, Danielle Dourado Magalhães<sup>15</sup>, Cristine Pilati Pileggi Castro<sup>15</sup>, Sabrina Frighetto Henrich<sup>15</sup>, Diogo Oliveira Toledo<sup>16</sup>, Bruna Fernanda Camargo Silva Parra<sup>16</sup>, Fernando Suparregui Dias<sup>17</sup>, Luiza Zerman<sup>17</sup>, Fernanda Formolo<sup>17</sup>, Marciano de Sousa Nobrega<sup>18</sup>, Claudio Piras<sup>19</sup>, Stéphanie de Barros Piras<sup>19</sup>, Rodrigo Conti<sup>19</sup>, Paulo Lisboa Bittencourt<sup>20</sup>, Ricardo Azevedo Cruz D'Oliveira<sup>20</sup>, André Ricardo de Oliveira Estrela<sup>20</sup>, Mirella Cristine de Oliveira<sup>21</sup>, Fernanda Baeumle Reese<sup>21</sup>, Jarbas da Silva Motta Júnior<sup>22</sup>, Bruna Martins Dzivielevski da Câmara<sup>22</sup>, Paula Geraldine David-João<sup>22</sup>, Luana Alves Tannous<sup>23</sup>, Viviane Bernardes de Oliveira Chaiben<sup>23</sup>, Lorena Macedo Araújo Miranda<sup>24</sup>, José Arthur dos Santos Brasil<sup>25</sup>, Rafael Alexandre de Oliveira Deucher<sup>10</sup>, Marcos Henrique Borges Ferreira<sup>26</sup>, Denner Luiz Vilela<sup>26</sup>, Guilherme Cincinato de Almeida<sup>26</sup>, Wagner Luis Nedel<sup>27</sup>, Matheus Golenia dos Passos<sup>27</sup>, Luiz Gustavo Marin<sup>27</sup>, Wilson de Oliveira Filho<sup>28</sup>, Raoni Machado Coutinho<sup>28</sup>, Michele Cristina Lima de Oliveira<sup>28</sup>, Gilberto Friedman<sup>29</sup>, André Meregalli<sup>29</sup>, Jorge Amilton Höher<sup>29</sup>, Afonso José Celente Soares<sup>30</sup>, Suzana Margareth Ajeje Lobo<sup>7</sup>

**Tabela S1** - Perfil dos centros incluídos no estudo, de acordo com a distribuição geográfica

| Características                          | Todos             | Sudeste             | Sul                 | Centro-Oeste        | Norte e Nordeste | Valor de p |
|------------------------------------------|-------------------|---------------------|---------------------|---------------------|------------------|------------|
| Número de leitos no hospital             | 303 (213 - 646,5) | 450 (227,5 - 831,7) | 222 (139,2 - 429,7) | 407 (311,7 - 601,2) | 281 (259 - 303)  | 0,504*     |
| Tipo de pacientes atendidos nas UTIs     |                   |                     |                     |                     |                  | 0,326†     |
| Apenas cirúrgicos                        | 4 (13,3)          | 3 (20)              | 0 (0)               | 1 (33,3)            | 0 (0)            |            |
| Cirúrgicos e clínicos                    | 26 (86,7)         | 12 (80)             | 10 (100)            | 2 (66,7)            | 2 (100)          |            |
| Número de leitos de UTI                  | 36 (20,2 - 56,5)  | 32 (22,5 - 52,2)    | 35 (21,5 - 50)      | 57 (24,7 - 84)      | 30,5 (21 - 40)   | 0,922*     |
| Hospitais que possuem semi-intensiva     | 9 (30)            | 6 (40)              | 2 (20)              | 0 (0)               | 1 (50)           | 0,414*     |
| Centros com residência médica em UTI     | 20 (66,7)         | 10 (66,7)           | 5 (50)              | 3 (100)             | 2 (100)          | 0,290*     |
| Centros com residência de cirurgia geral | 20 (66,7)         | 11 (73,3)           | 5 (50)              | 3 (100)             | 1(50)            | 0,348*     |
| UTIs com fisioterapia 24 horas por dia   | 20 (74,1)         | 11 (73,3)           | 7 (87,5)            | 1 (50)              | 1 (50)           | 0,580*     |
| Número de fisioterapeutas por pacientes  | 10 (8,0 - 10,0)   | 10 (9,2 - 10)       | 10 (10 - 10)        | 7,5 (7 - 8)         | 10 (10 - 10)     | 0,24*      |
| Número de enfermeiros por pacientes      | 6,5 (4,0 - 10,0)  | 7 (4 - 10)          | 10 (10 - 10)        | 5 (4 - 6)           | 7 (4 - 10)       | 0,613*     |
| Número de médicos por pacientes          | 10 (7,0 - 10,0)   | 10 (6,7 - 10)       | 10 (10 - 10)        | 8 (8 - 8)           | 8 (6 - 10)       | 0,688*     |
| Tipo de UTI                              |                   |                     |                     |                     |                  | 0,308†     |
| Pública                                  | 15 (51,7)         | 5 (35,7)            | 6 (75)              | 3 (75)              | 1 (33,3)         |            |
| Privada                                  | 14 (48,3)         | 9 (64,2)            | 2 (25)              | 1 (25)              | 2 (66,7)         |            |

UTI - unidade de terapia intensiva. \* Análise de variância; † teste do qui-quadrado. Resultados expressos como mediana (intervalo interquartil) ou n (%).

**Tabela S2** - Comparação de unidades de terapia intensiva públicas e privadas

| Características                          | Todos                | Públicas            | Privada               | Valor de p* |
|------------------------------------------|----------------------|---------------------|-----------------------|-------------|
| Logística de funcionamento das UTIs      |                      |                     |                       |             |
| Número de leitos no hospital             | 303 (216,5 - 636,75) | 303 (226,5 - 742,5) | 309,5 (120,0 - 627,0) | 0,7434      |
| Tipo de pacientes atendidos nas UTIs     |                      |                     |                       | 0,283       |
| Apenas cirúrgicos                        | 4 (13,3)             | 3 (20)              | 1 (6,7)               |             |
| Cirúrgicos e clínicos                    | 26 (86,7)            | 12 (80)             | 14 (93,3)             |             |
| Número de leitos de UTI                  | 36 (20,5 - 56)       | 40 (20 - 57)        | 30 (21 - 55)          | 0,8360      |
| Hospitais que possuem semi-intensiva     | 9 (30)               | 3 (20)              | 6 (40)                | 0,232       |
| Centros com residência médica em UTI     | 20 (66,2)            | 11 (73,3)           | 9 (60)                | 0,439       |
| Centros com residência de cirurgia geral | 20 (66,7)            | 13 (86,7)           | 7 (46,7)              | 0,020       |

Continua...

... continuação

| Características                         | Todos            | Públicas        | Privada         | Valor de p* |
|-----------------------------------------|------------------|-----------------|-----------------|-------------|
| UTIs com fisioterapia 24 horas por dia  | 20 (74,1)        | 8 (66,7)        | 12 (80)         | 0,432       |
| Número de fisioterapeutas por pacientes | 10 (8,0 - 10,0)  | 10 (10 - 10)    | 10 (7 - 10)     | 0,2573      |
| Número de enfermeiros por pacientes     | 6,5 (4,0 - 10,0) | 10 (5,5 - 10)   | 6 (4,0 - 9,25)  | 0,2616      |
| Número de médicos por pacientes         | 10 (7,0 - 10)    | 10 (6,25 - 10)  | 10 (7,25 - 10)  | 0,5694      |
| Características dos pacientes           |                  |                 |                 |             |
| n total pacientes (%)                   | 904 (100)        | 468 (51,7)      | 436 (48,2)      | 0,484†      |
| Idade, anos                             | 62 (50 - 72)     | 63 (52 - 73)    | 62 (49 - 72)    | 0,686†      |
| Homens                                  | 444 (53,8)       | 236 (55,9)      | 208 (51,6)      | 0,241†      |
| SAPS 3                                  | 42 (32 - 53)     | 45 (34 - 56)    | 40 (31 - 50)    | < 0,001†    |
| SOFA                                    | 2 (1 - 5)        | 3 (1 - 5)       | 1 (0 - 4)       | < 0,001†    |
| IMC                                     | 25 (22 - 28)     | 25 (22 - 28)    | 25 (22 - 28)    | 0,773†      |
| Etnia                                   |                  |                 |                 |             |
| Caucasiano                              | 585 (71,3)       | 314 (71,0)      | 271 (71,7)      | 0,898*      |
| Pardo                                   | 157 (19,1)       | 74 (16,7)       | 83 (22,0)       | 0,071*      |
| Negro                                   | 61 (7,4)         | 42 (9,5)        | 19 (5,0)        | 0,021*      |
| Outros                                  | 17 (2,1)         | 12 (2,8)        | 2 (1,3)         | 1,000*      |
| ASA                                     | 2 (2 - 3)        | 3 (2 - 3)       | 2 (2 - 3)       | < 0,001†    |
| Duração da cirurgia, minutos            | 240 (180 - 360)  | 240 (180 - 360) | 260 (180 - 390) | < 0,001†    |
| Tipos de cirurgia                       |                  |                 |                 |             |
| Eletiva                                 | 613 (69,2)       | 273 (59,2)      | 340 (80,0)      | < 0,001*    |
| Urgência                                | 147 (16,6)       | 85 (18,4)       | 62 (14,6)       | < 0,081*    |
| Emergência                              | 126 (14,2)       | 93 (20,2)       | 33 (7,8)        | < 0,001*    |
| Cirurgia                                |                  |                 |                 |             |
| Abdominal                               | 252 (28,1)       | 115 (25,0)      | 137 (31,4)      | 0,039*      |
| Oncológica                              | 250 (27,9)       | 90 (19,6)       | 160 (36,7)      | < 0,001*    |
| Neurológicos                            | 186 (20,8)       | 68 (14,8)       | 118 (27,1)      | < 0,001*    |
| Ortopédicos                             | 143 (16,0)       | 78 (17,0)       | 65 (14,9)       | 0,456*      |
| Vascular                                | 74 (8,3)         | 61 (13,3)       | 13 (3,0)        | < 0,001*    |
| Torácica                                | 53 (5,9)         | 23 (5,0)        | 30 (6,9)        | 0,293*      |
| Urológica                               | 23 (4,8)         | 14 (5,7)        | 9 (4,0)         | 0,530*      |
| Cabeça e pescoço                        | 39 (4,4)         | 19 (4,1)        | 20 (4,6)        | 0,864*      |
| Ginecológica                            | 16 (3,4)         | 7 (3,1)         | 9 (3,6)         | 0,948*      |
| Outros                                  | 55 (6,1)         | 34 (7,4)        | 21 (4,8)        | 0,180*      |
| Doença subjacente                       |                  |                 |                 |             |
| Hipertensão arterial                    | 396 (44,2)       | 211 (45,9)      | 185 (42,4)      | 0,003*      |
| Câncer                                  | 191 (21,3)       | 55 (12,0)       | 136 (31,2)      | < 0,001*    |
| <i>Diabetes mellitus</i>                | 188 (21,0)       | 105 (22,8)      | 83 (19,0)       | 0,002*      |
| Tabagismo                               | 134 (15,0)       | 97 (21,1)       | 37 (8,5)        | 0,251*      |
| Insuficiência coronariana               | 67 (7,5)         | 36 (7,8)        | 31 (7,1)        | < 0,001*    |
| DPOC                                    | 54 (6,0)         | 30 (6,5)        | 24 (5,5)        | 0,520*      |
| Insuficiência renal crônica             | 48 (5,4)         | 26 (5,7)        | 22 (5,0)        | 0,002*      |
| Acidente vascular cerebral              | 27 (3,0)         | 20 (4,3)        | 7 (1,6)         | 0,700*      |
| Etilismo                                | 46 (5,1)         | 33 (7,2)        | 13 (3,0)        | 0,241*      |
| Arritmia                                | 44 (4,9)         | 21 (4,6)        | 23 (5,3)        | 0,391*      |
| Tipo de anestesia                       |                  |                 |                 |             |
| Anestesia geral                         | 642 (73,6)       | 314 (70,7)      | 328 (76,6)      | 0,006*      |
| Anestesia neuraxial                     | 80 (9,2)         | 49 (11,0)       | 31 (7,2)        | 0,009*      |
| Anestesia geral e anestesia neuraxial   | 150 (17,2)       | 81 (18,2)       | 69 (16,1)       | < 0,001*    |

UTI - unidade de terapia intensiva; SAPS 3 - *Simplified Acute Physiology Score 3*; SOFA - *Sequential Organ Failure Assessment Score*; IMC - índice de massa corporal; ASA - *American Society of Anesthesiologists*; DPOC - doença pulmonar obstrutiva crônica. \* análise de variância; † qui-quadrado. Resultados expressos como mediana (intervalo interquartil) ou n (%).
